# Supplementary material
Source: publisher figshare collection journal article supplement (https://diabetesjournals.figshare.com/articles/dataset/_/19609845)
Supplement: Supplementary file 1 [file 34831473]

**Table S1. Unweighted and weighted participant characteristics in the discovery set and unweighted participant characteristics in the PETALS cohort**

|                                                           | Discovery set<br>(n=271) |                  | PETALS cohort<br>(n=3,162) |
|-----------------------------------------------------------|--------------------------|------------------|----------------------------|
|                                                           | Unweighted               | Weighted*        | Unweighted                 |
| <b>Age at delivery, y, mean <math>\pm</math> SD</b>       | 32.0 $\pm$ 4.6           | 30.0 $\pm$ 0.5   | 30.2 $\pm$ 5.3             |
| <b>Age at delivery, y, %</b>                              |                          |                  |                            |
| <25                                                       | 7.7                      | 20.8 (12.6-28.9) | 16.0                       |
| 25-29                                                     | 18.8                     | 24.4 (17.7-31.2) | 25.9                       |
| 30-34                                                     | 45.0                     | 35.1 (28.9-41.3) | 36.7                       |
| $\geq 35$                                                 | 28.4                     | 19.7 (15.3-24.1) | 21.4                       |
| <b>Race/ethnicity, %</b>                                  |                          |                  |                            |
| White                                                     | 21.8                     | 25.6 (19.5-31.6) | 21.6                       |
| Hispanic                                                  | 32.8                     | 13.4 (6.6-20.3)  | 10.3                       |
| Black                                                     | 9.2                      | 15.6 (12.8-18.4) | 23.1                       |
| Asian/Pacific Islander                                    | 30.3                     | 41.3 (33.4-49.2) | 41.8                       |
| Other/Unknown                                             | 5.9                      | 4.1 (2.0-6.2)    | 3.2                        |
| <b>Education, %</b>                                       |                          |                  |                            |
| High school or less                                       | 11.4                     | 17.1 (9.6-24.6)  | 14.5                       |
| Some college                                              | 40.2                     | 44.6 (35.7-53.5) | 37.8                       |
| College graduate or above                                 | 48.3                     | 38.3 (30.9-48.6) | 47.6                       |
| <b>Nulliparity, %</b>                                     | 44.6                     | 52.9 (44.6-61.3) | 44.3                       |
| <b>Pre-pregnancy BMI, kg/m<sup>2</sup>, %<sup>†</sup></b> |                          |                  |                            |
| Underweight/normal weight                                 | 19.8                     | 32.0 (24.2-39.8) | 38.4                       |
| Overweight                                                | 38.5                     | 31.9 (23.4-40.3) | 31.2                       |
| Obese                                                     | 41.8                     | 36.1 (27.5-44.6) | 30.4                       |
| <b>Chronic hypertension, %</b>                            | 5.9                      | 3.8 (1.8-5.8)    | 4.4                        |
| <b>Family history of diabetes, %</b>                      | 24.4                     | 17.8 (12.3-23.7) | 23.5                       |
| <b>History of GDM, %</b>                                  | 6.6                      | 1.8 (0.8-2.9)    | 3.1                        |
| <b>GDM, %</b>                                             | 33.6                     | 9.0 (6.3-11.8)   | 9.8                        |

BMI, body mass index.

\* Descriptive statistics were derived by applying the sampling weight as described in the Methods section.

<sup>†</sup> Non-Asians were categorized as underweight (BMI <18.5 kg/m<sup>2</sup>), normal weight (18.5–24.9 kg/m<sup>2</sup>), overweight (25.0–29.9 kg/m<sup>2</sup>), and obese ( $\geq 30.0$  kg/m<sup>2</sup>). Asians were categorized as underweight (<18.5 kg/m<sup>2</sup>), normal weight (18.5–22.9 kg/m<sup>2</sup>), overweight (23.0–27.4 kg/m<sup>2</sup>), and obese ( $\geq 27.5$  kg/m<sup>2</sup>).

**Table S2. Participant characteristics in the validation sets 1 (a random sample in the PETALS cohort) and 2 (a nested case-control study within the GLOW trial)<sup>a</sup>**

|                                                               | Validation set 1 |               |                    |          | Validation set 2 |               |                   |          |
|---------------------------------------------------------------|------------------|---------------|--------------------|----------|------------------|---------------|-------------------|----------|
|                                                               | All<br>(n=414)   | GDM<br>(n=42) | Non-GDM<br>(n=372) | P-value* | All<br>(n=105)   | GDM<br>(n=35) | Non-GDM<br>(n=70) | P-value* |
| <b>Age at delivery, y, n (%)</b>                              |                  |               |                    | 0.59     |                  |               |                   | 0.28     |
| <25                                                           | 52 (12.6)        | 3 (7.1)       | 49 (13.2)          |          | 2 (1.9)          | 2 (5.7)       | 0 (0.0)           |          |
| 25-29                                                         | 108 (26.1)       | 10 (23.8)     | 98 (26.3)          |          | 5 (4.8)          | 1 (2.9)       | 4 (5.7)           |          |
| 30-34                                                         | 160 (38.6)       | 17 (40.5)     | 143 (38.4)         |          | 63 (60.0)        | 21 (60.0)     | 42 (60.0)         |          |
| ≥35                                                           | 94 (22.7)        | 12 (28.6)     | 82 (22.0)          |          | 35 (33.3)        | 11 (31.4)     | 24 (34.3)         |          |
| <b>Race/ethnicity, n (%)</b>                                  |                  |               |                    | 0.05     |                  |               |                   |          |
| White                                                         | 105 (25.4)       | 9 (21.4)      | 96 (25.8)          |          | 15 (14.3)        | 5 (14.3)      | 10 (14.3)         | 1.00     |
| Hispanic                                                      | 105 (25.4)       | 8 (19.0)      | 97 (26.1)          |          | 27 (25.7)        | 9 (25.7)      | 18 (25.7)         |          |
| Black                                                         | 99 (23.9)        | 7 (16.7)      | 92 (24.7)          |          | 3 (2.9)          | 1 (2.9)       | 2 (2.9)           |          |
| Asian/Pacific Islander                                        | 105 (25.4)       | 18 (42.9)     | 87 (23.4)          |          | 42 (40.0)        | 14 (40.0)     | 28 (40.0)         |          |
| Other/unknown                                                 |                  |               |                    |          | 18 (17.1)        | 6 (17.1)      | 12 (17.1)         |          |
| <b>Education, n (%)</b>                                       |                  |               |                    | 0.80     |                  |               |                   | 0.08     |
| High school or less                                           | 53 (12.8)        | 4 (9.5)       | 49 (13.2)          |          | 7 (6.7)          | 5 (14.3)      | 2 (2.9)           |          |
| Some college                                                  | 151 (36.6)       | 16 (38.1)     | 135 (36.4)         |          | 17 (16.2)        | 6 (17.1)      | 11 (15.7)         |          |
| College graduate or above                                     | 209 (50.6)       | 22 (52.4)     | 187 (50.4)         |          | 81 (77.1)        | 24 (68.6)     | 57 (81.4)         |          |
| <b>Nulliparity, n (%)</b>                                     | 185 (44.7)       | 18 (42.9)     | 167 (44.9)         | 0.80     | 51 (48.6)        | 19 (54.3)     | 32 (45.7)         | 0.41     |
| <b>Pre-pregnancy BMI, kg/m<sup>2</sup>, n (%)<sup>†</sup></b> |                  |               |                    | 0.01     |                  |               |                   | 0.04     |
| Underweight/normal weight                                     | 160 (38.6)       | 9 (21.4)      | 151 (40.6)         |          | -                | -             | -                 |          |
| Overweight                                                    | 115 (27.8)       | 10 (23.8)     | 105 (28.2)         |          | 71 (67.6)        | 19 (54.3)     | 52 (74.3)         |          |
| Obese                                                         | 139 (33.6)       | 23 (54.8)     | 116 (31.2)         |          | 34 (32.4)        | 16 (45.7)     | 18 (25.7)         |          |
| <b>Chronic hypertension, n (%)</b>                            | 26 (6.3)         | 2 (4.8)       | 24 (6.5)           | 0.67     | 1 (1.4)          | 0 (0.0)       | 1 (2.9)           | 1.00     |
| <b>Family history of diabetes, n (%)</b>                      | 95 (22.9)        | 12 (28.6)     | 83 (22.3)          | 0.36     | 17 (16.2)        | 11 (31.4)     | 6 (8.6)           | 0.003    |
| <b>History of GDM, n (%)</b>                                  | 11 (2.7)         | 4 (9.5)       | 7 (1.9)            | 0.004    | 9 (8.6)          | 7 (20.0)      | 2 (2.9)           | 0.01     |
| <b>GLOW trial arms</b>                                        |                  |               |                    |          |                  |               |                   |          |
| Intervention                                                  | NA               | NA            | NA                 |          | 55 (52.4)        | 18 (51.4)     | 37 (52.9)         | 0.89     |
| Usual care                                                    | NA               | NA            | NA                 |          | 50 (47.6)        | 17 (48.6)     | 33 (47.1)         |          |

BMI, body mass index; GDM, gestational diabetes; GLOW, Gestational Weight Gain and Optimal Wellness; NA, not applicable.

\*P values for differences between women with and without GDM were obtained by student's t-test for continuous variables and Chi-square or Fisher's exact test for categorical variables.

<sup>†</sup>Non-Asians were categorized as underweight (BMI <18.5 kg/m<sup>2</sup>), normal weight (18.5–24.9 kg/m<sup>2</sup>), overweight (25.0–29.9 kg/m<sup>2</sup>), and obese (≥30.0 kg/m<sup>2</sup>). Asians were categorized as underweight (<18.5 kg/m<sup>2</sup>), normal weight (18.5–22.9 kg/m<sup>2</sup>), overweight (23.0–27.4 kg/m<sup>2</sup>), and obese (≥27.5 kg/m<sup>2</sup>).

**Supplemental Figure 1. Treemap showing the distribution of metabolites among super pathway (in color) and their related sub-pathways (square) for the 144 metabolites used for statistical and bioinformatics analysis.**

Each number corresponds to the number of metabolites within each sub-pathway.

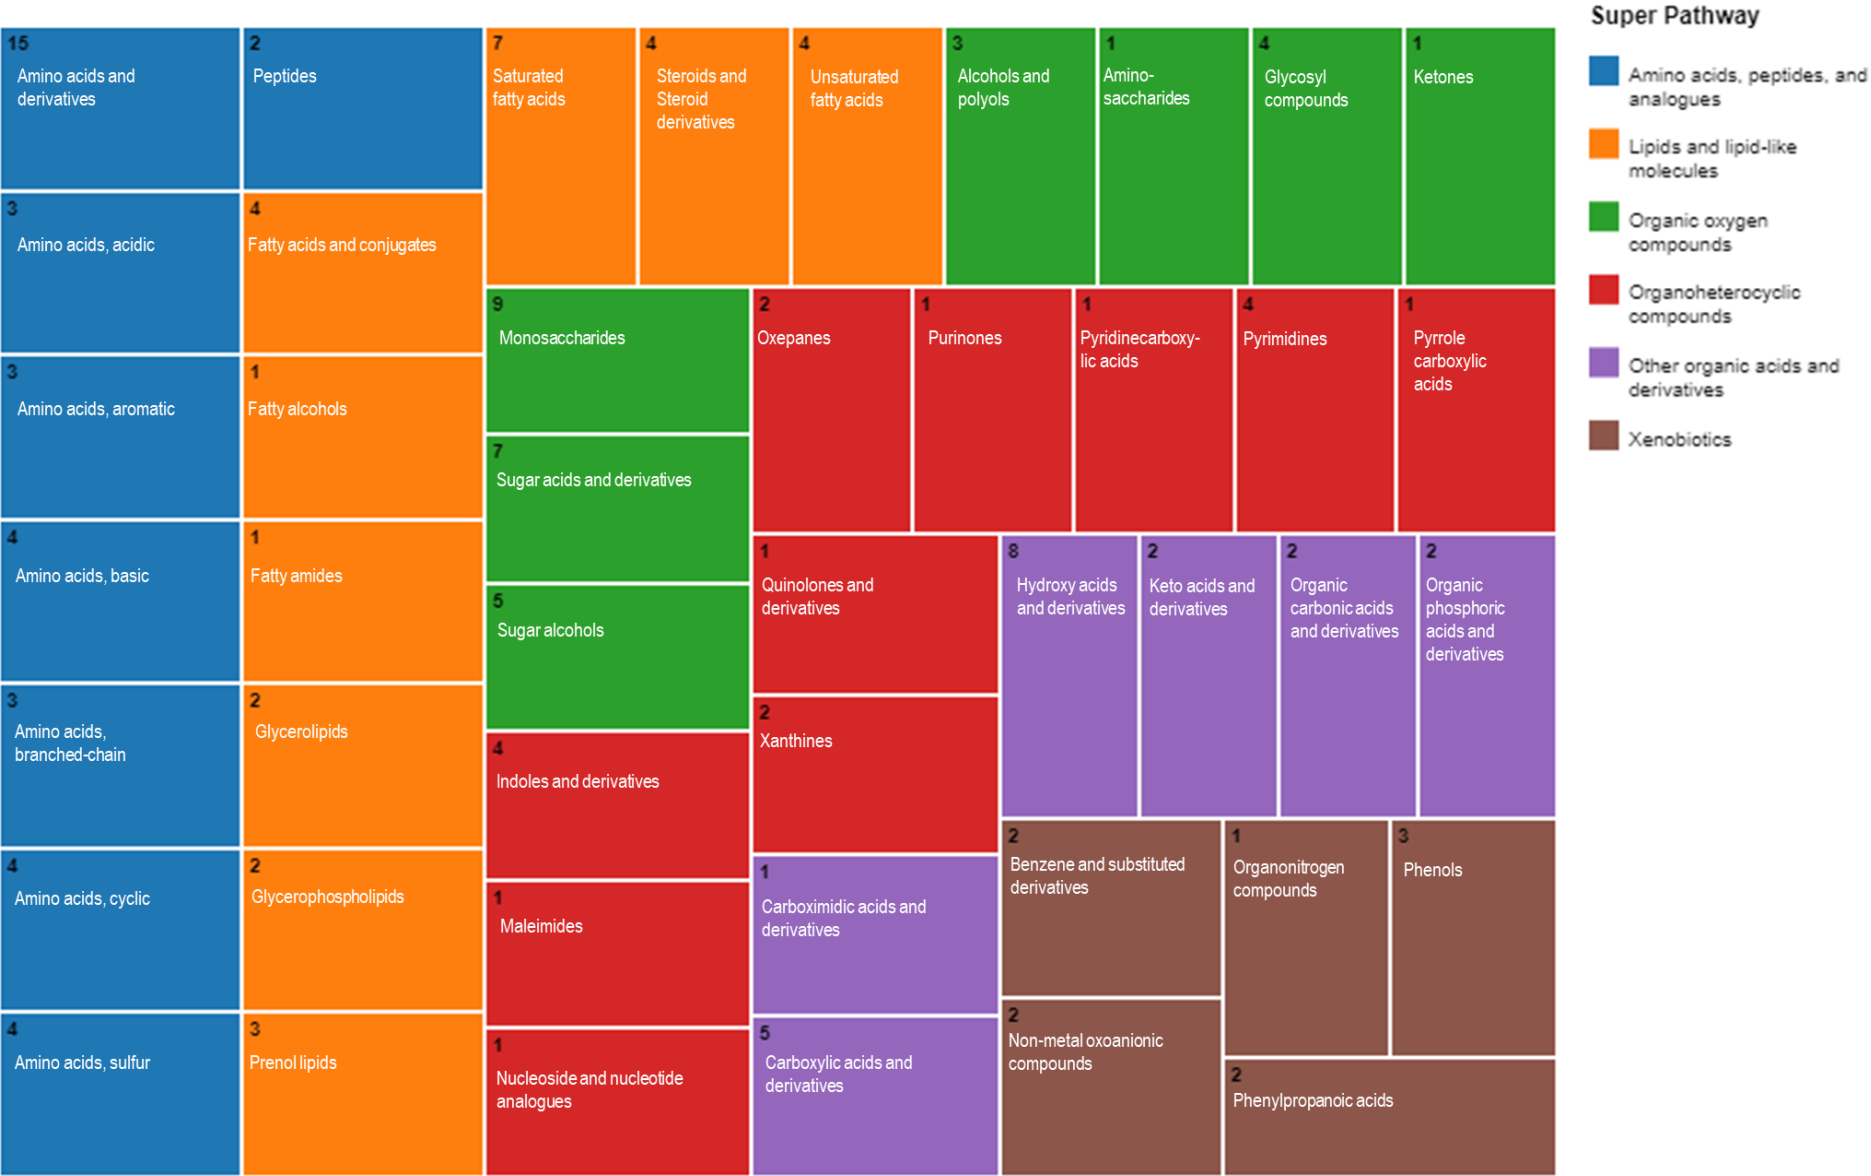

**Supplemental Figure 2. Radar plots showing the univariate associations of individual metabolite within each pathway at A) 10-13 and B) 16-19 weeks of gestation with risk of subsequent gestational diabetes in the PETALS nested case-control discovery set.**

Red circle represents odds ratio (OR) of 1; blue circle represents adjusted OR of GDM risk associated with each metabolite after adjusting for covariates (age at delivery, race/ethnicity, family history of diabetes, chronic hypertension, history of gestational diabetes, pre-pregnancy body mass index, and gestational age at blood collection); and grey area represents 95% confidence interval.

\*P-value after FDR adjustment <0.05.

## A Amino acids, peptides and analogues

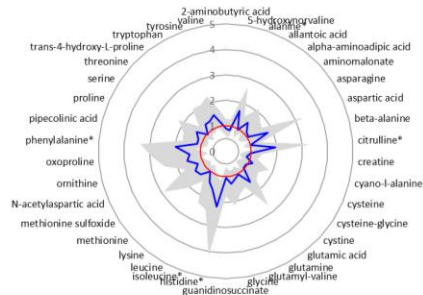

## Lipids and lipid-like molecules

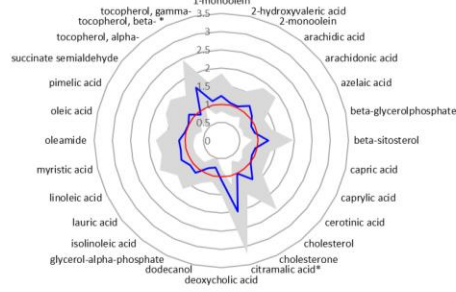

## Organic oxygen compounds

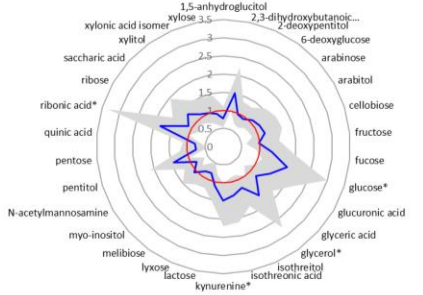

## Organoheterocyclic compounds

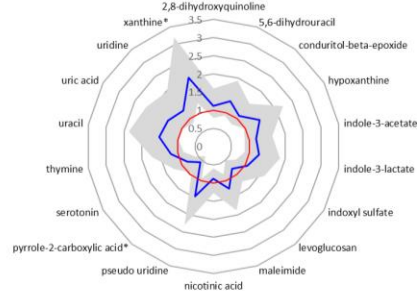

## Other organic acids and derivatives

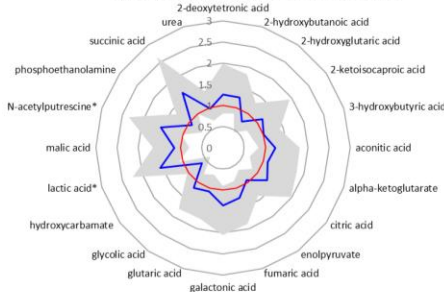

## Xenobiotics

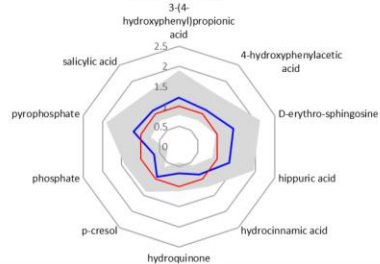

## B Amino acids, peptides and analogues

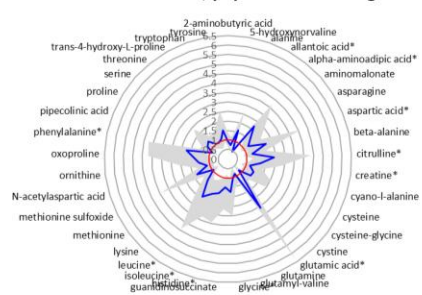

## Lipids and lipid-like molecules

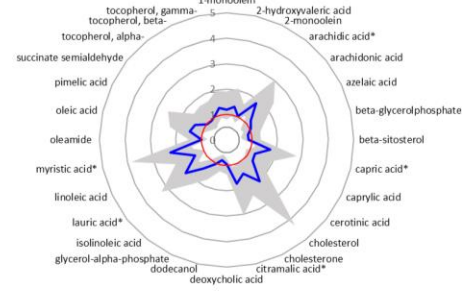

## Organic oxygen compounds

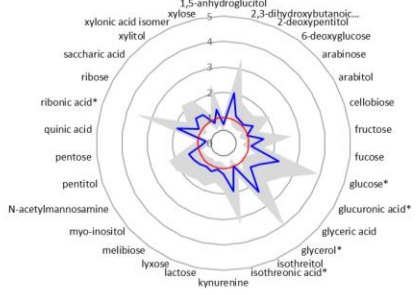

## Organoheterocyclic compounds

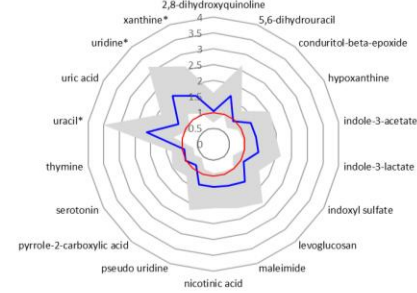

## Other organic acids and derivatives

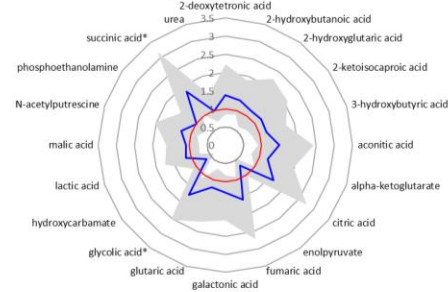

## Xenobiotics

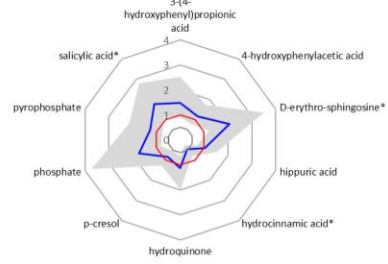

**Supplemental Figure 3. Univariate analysis: Individual metabolites at gestational weeks 10-13 and 16-19 significantly associated with risk of gestational diabetes in the PETALS nested case-control discovery set\***

\*Adjusted for maternal age at delivery, race/ethnicity, family history of diabetes, chronic hypertension, history of gestational diabetes, pre-pregnancy body mass index, and gestational age at blood collection.

Metabolites in the plot were ordered based on the significance level of P-value for positive and inverse associations at each time window, respectively.

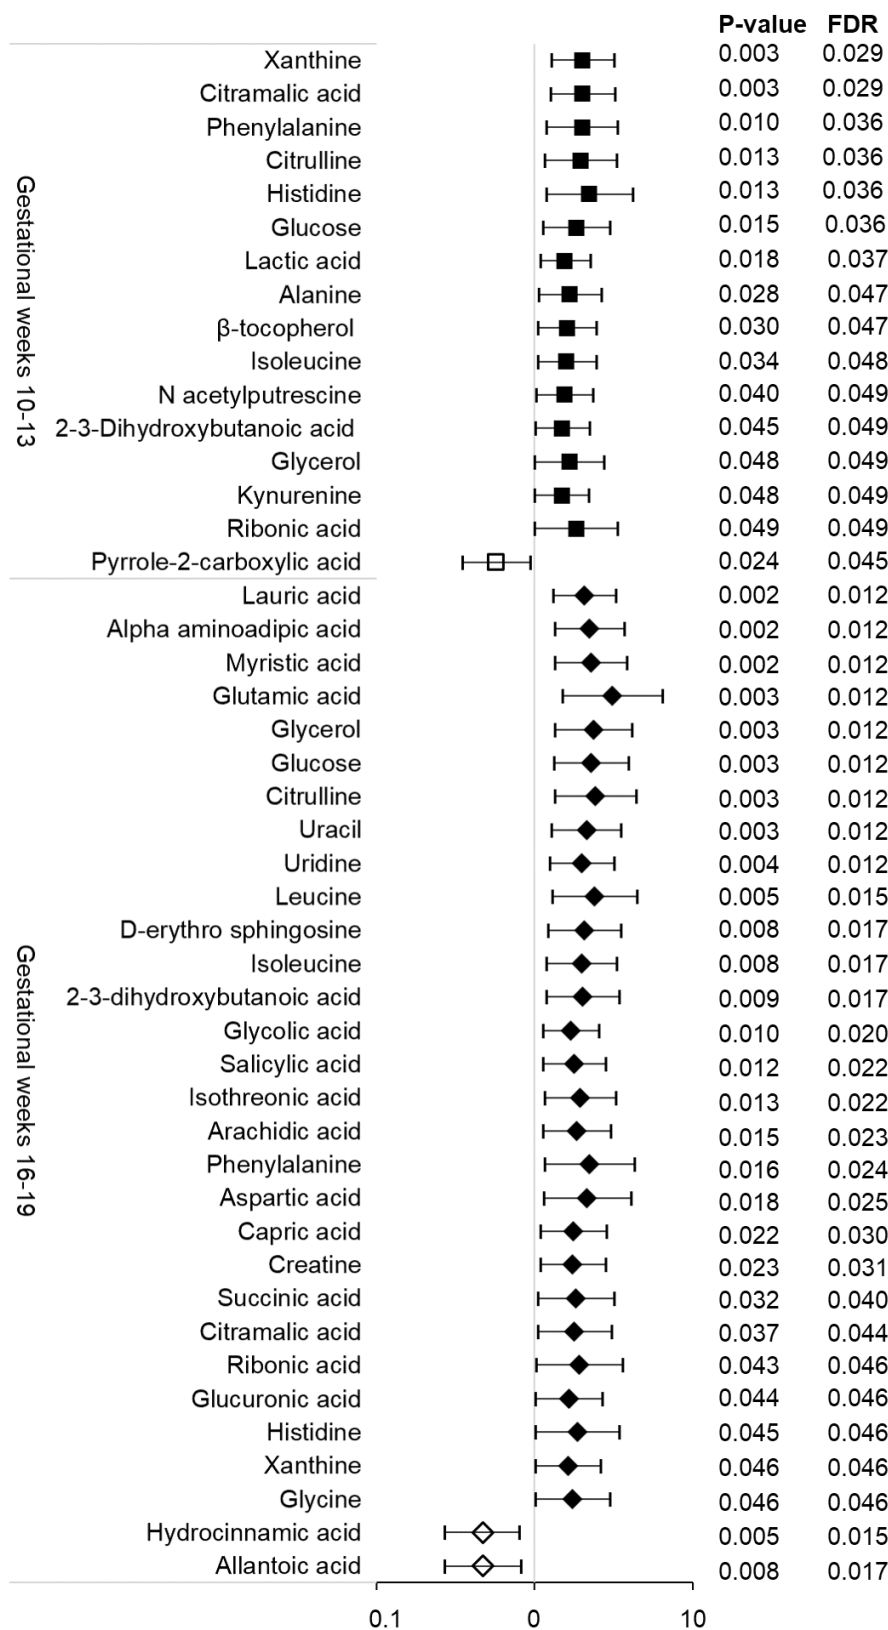

**Supplemental Figure 4. Multivariate ChemRICH enrichment plots depicting all pathways identified at A) 10-13 weeks and 2) 16-19 weeks of gestation in the PETALS nested case-control discovery set**

Red bars, upregulation; green bars, downregulation. Dashed lines:  $P < 0.05$  corresponds to  $-\log_{10}$  of P-value  $> 1.3$  for upregulated pathways and  $\log_{10}$  of P-value  $< -1.3$  for downregulated pathways.

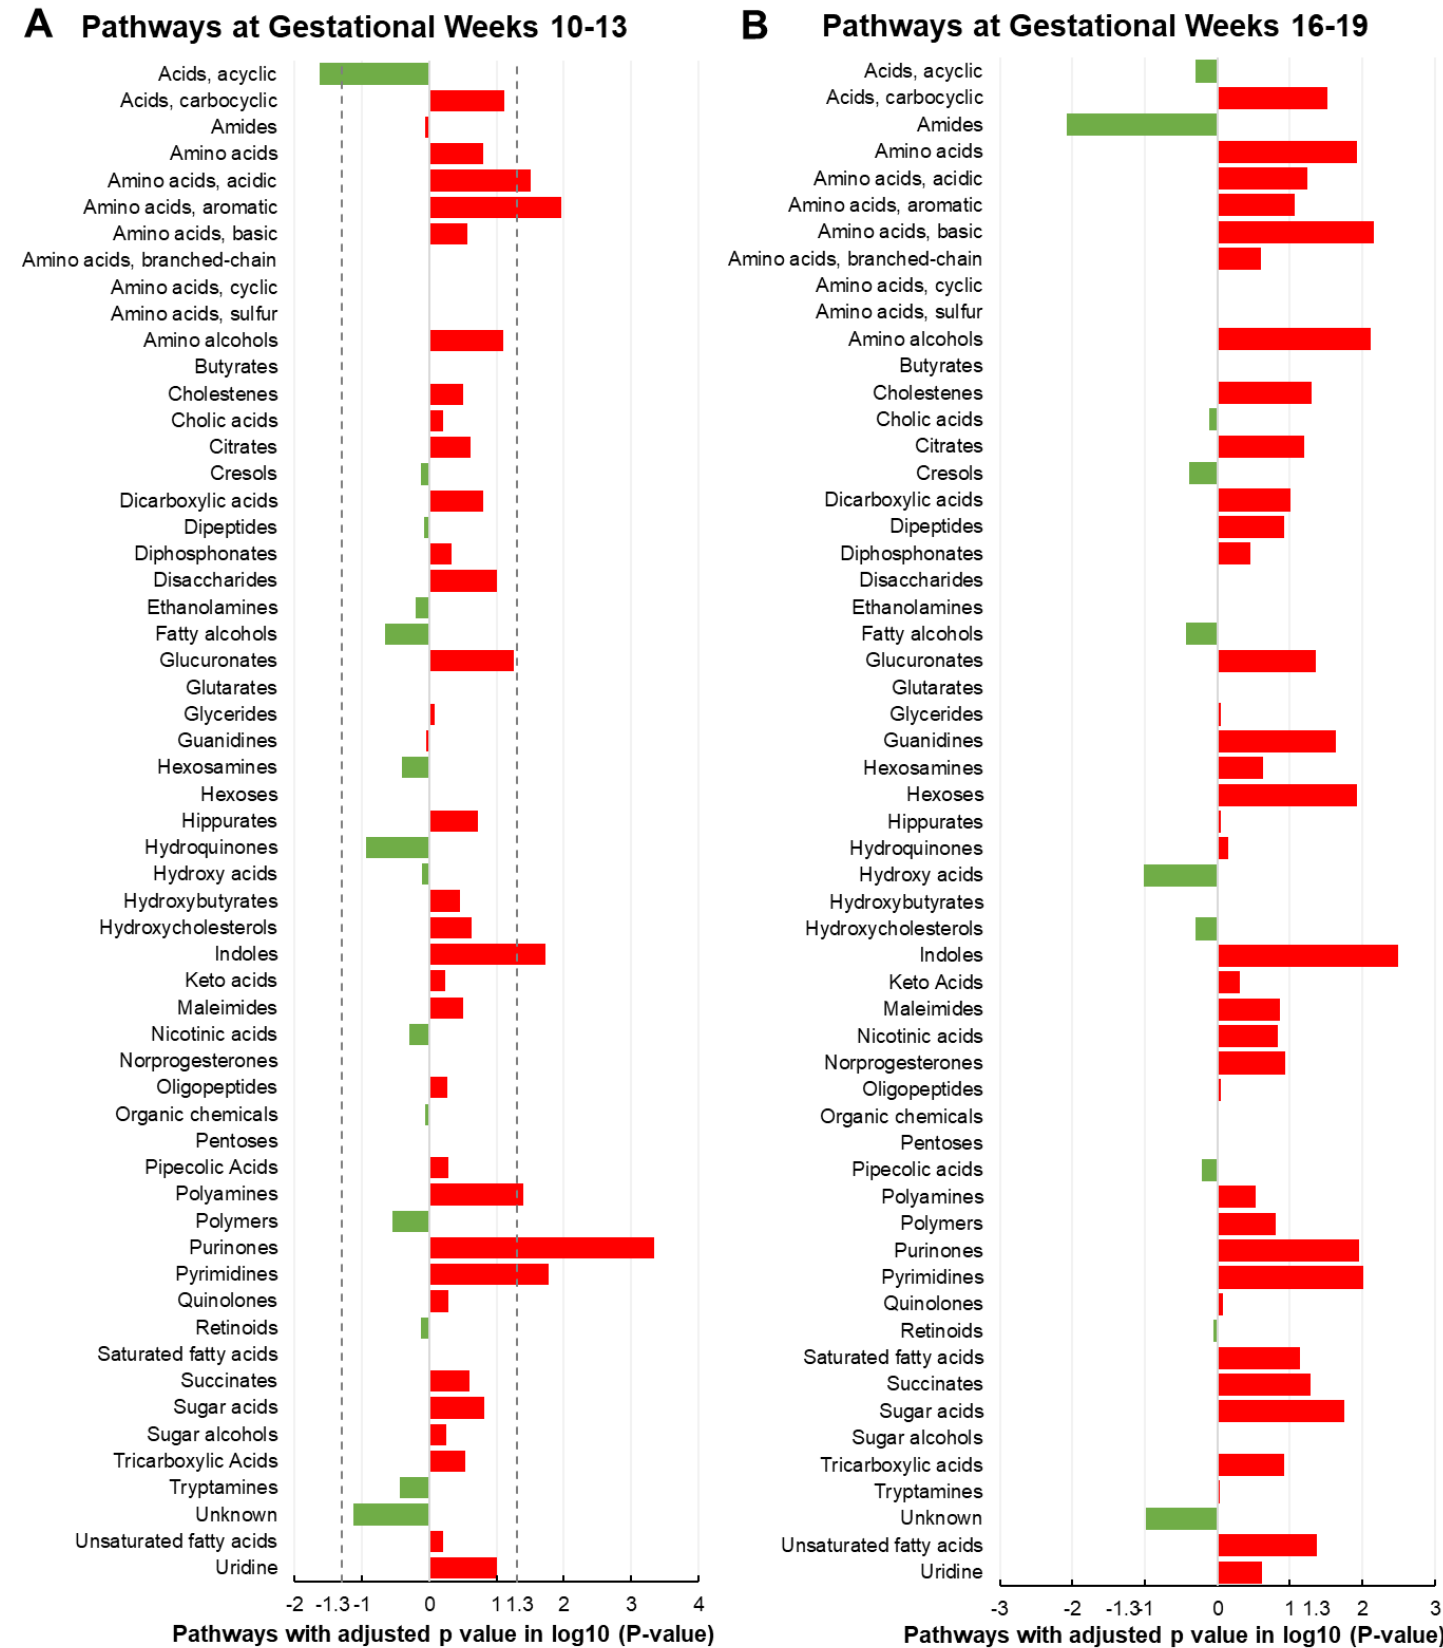

**Table S3.** Univariate analysis: Changes in individual metabolites from gestational weeks 10-13 to 16-19 significantly associated with risk of gestational diabetes in the PETALS nested case-control discovery set\*

| Metabolites                  | Adjusted OR (95% CI) <sup>†</sup> | P-value | FDR   |
|------------------------------|-----------------------------------|---------|-------|
| <b>Positive associations</b> |                                   |         |       |
| Creatine                     | 1.63 (1.06, 2.49)                 | 0.025   | 0.695 |
| Fructose                     | 1.61(1.04, 2.49)                  | 0.034   | 0.695 |
| N-acetylmannosamine          | 1.63(1.03, 2.56)                  | 0.037   | 0.695 |
| Myristic acid                | 1.54 (1.02, 2.31)                 | 0.038   | 0.695 |
| Phosphate                    | 1.62 (1.02, 2.57)                 | 0.042   | 0.695 |
| Uracil                       | 1.64 (1.01, 2.66)                 | 0.045   | 0.695 |
| <b>Inverse associations</b>  |                                   |         |       |
| Enolpyruvate                 | 0.64 (0.43, 0.96)                 | 0.030   | 0.695 |

\*Changes in metabolite concentrations were assessed by the ratio of metabolite concentrations at study clinic visit 2 (gestational weeks 16-19) divided by the concentrations at study clinic visit 1 (gestational weeks 10-13).

<sup>†</sup>Adjusted for maternal age at delivery, race/ethnicity, family history of diabetes, pre-existing hypertension, history of gestational diabetes, pre-pregnancy body mass index, and the difference in gestational age at blood collection between study clinical visits 1 and 2.

**Table S4. The putative pathways linking metabolites at gestational weeks 10-13 and 16-19 to risk of gestational diabetes using the multivariate ChemRICH analysis in the PETALS nested case-control discovery set.**

| Time window             | Pathway                     | P-value* | FDR   | Hits | Metabolite hits                                                                                | Key metabolite†            |
|-------------------------|-----------------------------|----------|-------|------|------------------------------------------------------------------------------------------------|----------------------------|
| Gestational weeks 10-13 | <b>Inverse association</b>  |          |       |      |                                                                                                |                            |
|                         | Acids, acyclic              | 0.024    | 0.118 | 1    | Pyrrole-2-carboxylic acid                                                                      | Pyrrole-2-carboxylic acid  |
|                         | <b>Positive association</b> |          |       |      |                                                                                                |                            |
|                         | Amino acids, acidic         | 0.031    | 0.129 | 3    | Aspartic acid, glutamic acid, N-acetylaspartic acid                                            | Glutamic acid              |
|                         | Amino acids, aromatic       | 0.011    | 0.118 | 3    | Phenylalanine, tryptophan, tyrosine                                                            | Phenylalanine              |
|                         | Indoles                     | 0.019    | 0.118 | 3    | Indole-3-acetate, indole-3-lactate, indoxyl sulfate                                            | Indole-3-acetate           |
|                         | Polyamines                  | 0.040    | 0.143 | 1    | N-acetylputrescine                                                                             | N-acetylputrescine         |
|                         | Purinones                   | 0.0005   | 0.011 | 3    | Hypoxanthine, uric acid, xanthine                                                              | Xanthine                   |
| Gestational weeks 16-19 | Pyrimidines                 | 0.017    | 0.118 | 4    | 5,6-dihydrouracil, thymine, uracil, uridine                                                    | Uracil                     |
|                         | <b>Inverse association</b>  |          |       |      |                                                                                                |                            |
|                         | Amides                      | 0.008    | 0.041 | 1    | Allantoic acid                                                                                 | Allantoic acid             |
|                         | <b>Positive association</b> |          |       |      |                                                                                                |                            |
|                         | Acids, carbocyclic          | 0.030    | 0.074 | 4    | 3-(4-hydroxyphenyl)propionic acid, 4-hydroxyphenylacetic acid, hydrocinnamic acid, quinic acid | Hydrocinnamic acid         |
|                         | Amino acids, basic          | 0.007    | 0.041 | 4    | Asparagine, glutamine, lysine, ornithine                                                       | Glutamine                  |
|                         | Amino acids, other          | 0.012    | 0.041 | 8    | 5-hydroxynorvaline, alanine, beta-alanine, citrulline, glycine, kynurenine, serine, threonine  | Citrulline                 |
|                         | Amino alcohols              | 0.008    | 0.041 | 1    | D-erythro-sphingosine                                                                          | D-erythro-sphingosine      |
|                         | Glucuronates                | 0.044    | 0.092 | 1    | Glucuronic acid                                                                                | Glucuronic acid            |
|                         | Guanidines                  | 0.023    | 0.063 | 1    | Creatine                                                                                       | Creatine                   |
|                         | Hexoses                     | 0.012    | 0.041 | 6    | 6-deoxyglucose, fructose, fucose, glucose, levoglucosan                                        | Levoglucosan               |
|                         | Indoles                     | 0.003    | 0.041 | 3    | Indole-3-acetate, indole-3-lactate, indoxyl sulfate                                            | Indole-3-acetate           |
|                         | Purinones                   | 0.011    | 0.041 | 3    | Hypoxanthine, uric acid, xanthine                                                              | Xanthine                   |
|                         | Pyrimidines                 | 0.010    | 0.041 | 4    | 5,6-dihydrouracil, thymine, uracil, uridine                                                    | Uracil                     |
|                         | Sugar acids                 | 0.018    | 0.054 | 4    | 2,3-dihydroxybutanoic acid, galactonic acid, glyceric acid, saccharic acid                     | 2,3-dihydroxybutanoic acid |
|                         | Unsaturated fatty acids     | 0.043    | 0.092 | 4    | Arachidonic acid, isolinoleic acid, linoleic acid, oleic acid                                  | Isolinoleic acid           |

\*The P value of each metabolite pathway was obtained by the Kolmogorov-Smirnov test after false discovery rate adjustment.

†The most significant metabolite within that pathway.

**Supplemental Figure 5. Model optimization of LASSO regression models for the selection of multi-metabolite panels at gestational weeks 10-13 (A) and 16-19 (B) in the PETALS nested case-control discovery set.**

Dotted lines on the left highlighted (A) 23 features (17 metabolites\* and 6 conventional risk factors†) and (B) 19 features (13 metabolites‡ and 6 conventional risk factors†) that generated the highest area under the curve (AUC) statistics. Dotted lines on the right indicated the marker for AUC within one standard error of the highest AUC.

\*The 17-metabolite panel included: 1-5 anhydroglucitol, 1-monoolein, 2-3-dihydroxybutanoic acid, 2-hydroxyglutaric acid, 5-6-dihydrouracil, alanine, alpha aminoadipic acid, beta alanine, beta-sitosterol, cellobiose, citramalic acid, citric acid, lactic acid, N-acetylputrescine,  $\beta$ -tocopherol, uric acid, and urea.

†Included age at delivery, family history of diabetes, chronic hypertension, history of gestational diabetes, pre-pregnancy body mass index, and fasting serum glucose.

‡The 13-metabolite panel included: 1-5 anhydroglucitol, 2-3-dihydroxybutanoic acid, 2 aminobutyric acid, alpha aminoadipic acid, arachidic acid, aspartic acid, citric acid, hydrocinnamic acid, lauric acid, oleic acid, quinic acid, uracil, uridine.

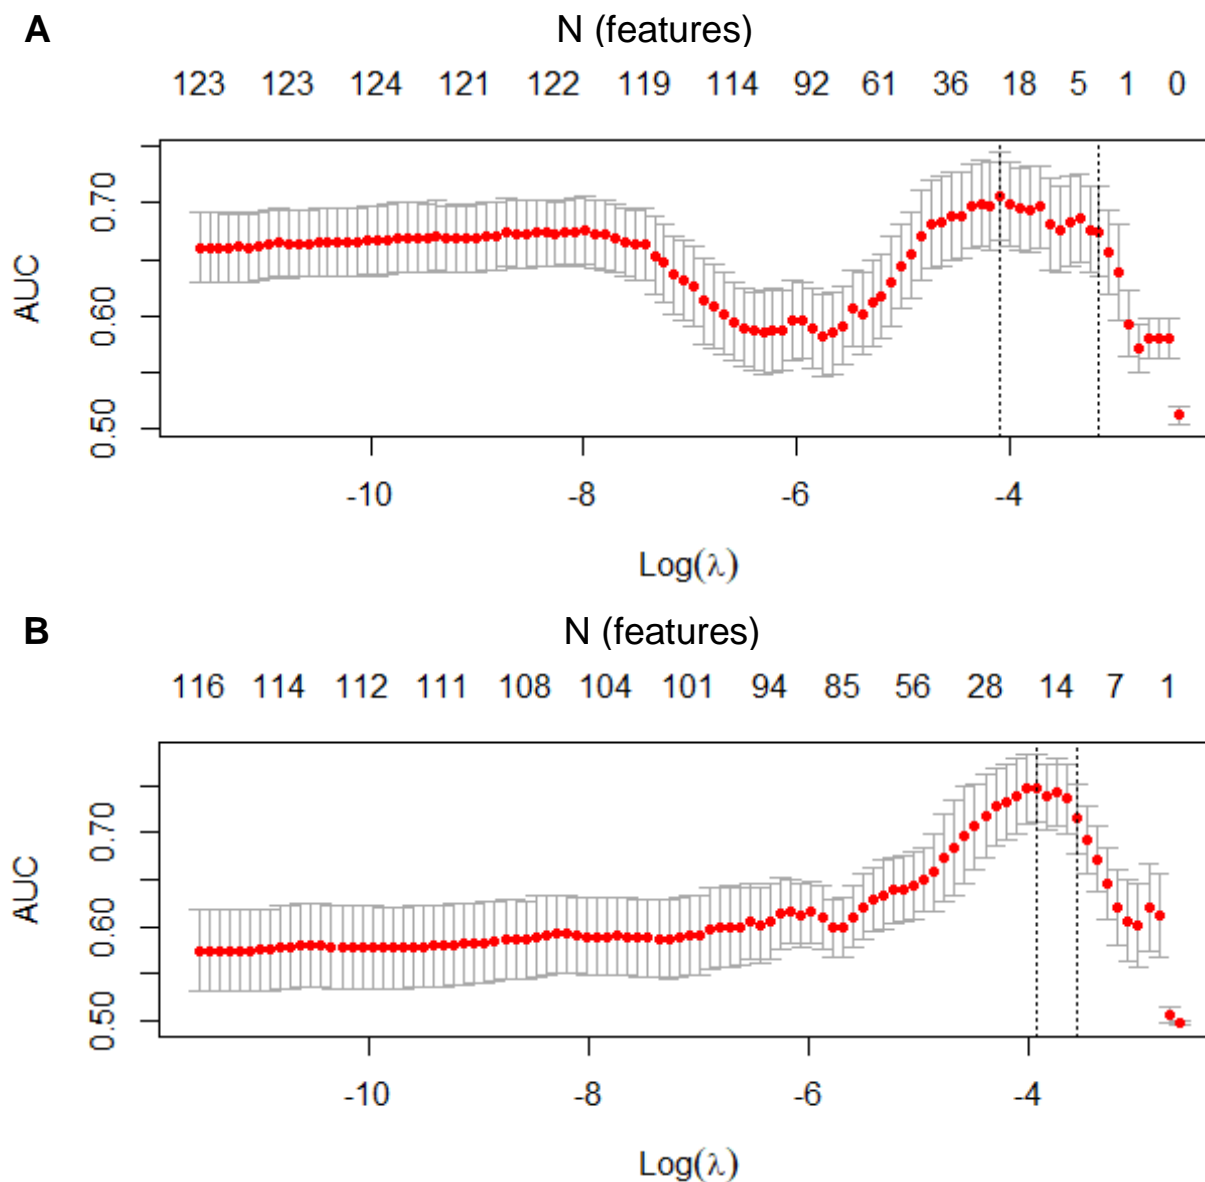

**Table S5. Predictive performance of multi-metabolite panels at gestational weeks 10-13 and 16-19 beyond conventional risk factors for gestational diabetes using LASSO regression algorithms**

|                                                   | Discovery Set <sup>1</sup> |       | Validation Set 1 <sup>2</sup> |       | Validation Set 2 <sup>3</sup> |       |
|---------------------------------------------------|----------------------------|-------|-------------------------------|-------|-------------------------------|-------|
|                                                   | PPV                        | NPV   | PPV                           | NPV   | PPV                           | PPV   |
| <b>Gestational weeks 10-13</b>                    |                            |       |                               |       |                               |       |
| Model 1 (conventional factors) <sup>4</sup>       | 0.700                      | 0.774 | 0.479                         | 0.853 | 0.655                         | 0.789 |
| Model 2 (metabolites) <sup>5</sup>                | 0.677                      | 0.855 | 0.721                         | 0.952 | 0.794                         | 0.887 |
| Model 3 (conventional + metabolites) <sup>6</sup> | 0.720                      | 0.913 | 0.706                         | 0.890 | 1.000                         | 0.959 |
| <b>Gestational weeks 16-19</b>                    |                            |       |                               |       |                               |       |
| Model 1 (conventional factors) <sup>4</sup>       | 0.457                      | 0.855 | 0.500                         | 0.917 | NA                            | NA    |
| Model 2 (metabolites) <sup>7</sup>                | 0.947                      | 0.799 | 0.879                         | 0.938 | NA                            | NA    |
| Model 3 (conventional + metabolites) <sup>6</sup> | 0.810                      | 0.844 | 0.857                         | 0.886 | NA                            | NA    |

LASSO, least absolute shrinkage and selection operator; NA, not applicable; NPV, negative predictive value; PPV, positive predictive value.

<sup>1</sup>Discovery set was a matched case-control study of 91 GDM cases and 180 non-GDM controls in the Pregnancy Environment and Lifestyle Study (PETALS) cohort.

<sup>2</sup>Validation set 1 was a random sample of 42 GDM and 372 non-GDM women in the PETALS cohort.

<sup>3</sup>Validation set 2 was a case-control study of 30 GDM cases and 60 non-GDM controls in the Gestational Weight Gain and Optimal Wellness (GLOW) randomized controlled trial.

<sup>4</sup>Model 1 included conventional risk factors: age, race/ethnicity, family history of diabetes, pre-existing hypertension, history of gestational diabetes, pre-pregnancy body mass index, and gestational age at blood collection, and serum glucose levels.

<sup>5</sup>Model 2 included a 17-metabolite panel selected by LASSO regression at gestational weeks 10-13 (1-5 anhydroglucitol, 1-monoolein, 2-3-dihydroxybutanoic acid, 2-hydroxyglutaric acid, 5-6-dihydrouacil, alanine, alpha aminoadipic acid, beta alanine, beta-sitosterol, cellobiose, citramalic acid, citric acid, lactic acid, N-acetylputrescine,  $\beta$ -tocopherol, uric acid, and urea).

<sup>6</sup>Model 3 included conventional risk factors in Model 1 and metabolites in Model 2.

<sup>7</sup>Model 2 included a 13-metabolite panel selected by LASSO regression at gestational weeks 16-19 (1-5 anhydroglucitol, 2-3-dihydroxybutanoic acid, 2 aminobutyric acid, alpha aminoadipic acid, arachidic acid, aspartic acid, citric acid, hydrocinnamic acid, lauric acid, oleic acid, quinic acid, uracil, uridine).
